# Supplementary material for: Characteristics of patients who had a stroke not initially identified during emergency prehospital assessment: a systematic review
Source: PubMed Central journal article supplement — Emerg Med J. 2021 Feb 19;38(5):387–93. doi: 10.1136/emermed-2020-209607 (PMC8077214; doi:10.1136/emermed-2020-209607), 2021-02-19
Supplement: emermed-2020-209607supp001.pdf [file emermed-2020-209607supp001.pdf]

**Search Strategy:**

1. exp cerebrovascular accident/
2. stroke.mp.
3. cerebrovascular accident.mp.
4. 1 or 2 or 3
5. exp cerebrovascular accident/di [Diagnosis]
6. exp stroke/di
7. 5 or 6
8. (recogni\$ or identi\$ or strati\$ or screen\$).mp.
9. 4 and 8
10. 7 or 9
11. ambulance/
12. air medical transport/
13. exp emergency care/
14. emergency medical services/
15. emergency health service/
- 16 paramedics/
17. emergency medical technicians/
18. emergency/
20. 11 or 12 or 13 or 14 or 15 or 16 or 17 or 18
21. 10 and 20
