# Supplementary material for: Characteristics of patients who had a stroke not initially identified during emergency prehospital assessment: a systematic review
Source: PubMed Central journal article supplement — Emerg Med J. 2021 Feb 19;38(5):387–93. doi: 10.1136/emermed-2020-209607 (PMC8077214; doi:10.1136/emermed-2020-209607), 2021-02-19
Supplement: emermed-2020-209607supp002.pdf [file emermed-2020-209607supp002.pdf]

Online Supplementary File 2. Quality Assessment of Diagnostic Accuracy Studies version 2 of included studies

| <b>Study author (year)</b> | <b>Patient selection</b> | <b>Index test</b> | <b>Reference standard</b> | <b>Flow and timing</b> |
|----------------------------|--------------------------|-------------------|---------------------------|------------------------|
| Andersson et al. (2018)    | High                     | Not applicable    | Not applicable            | Not applicable         |
| Asimos et al. (2014)       | High                     | Low               | Low                       | Low                    |
| Berglund et al. (2014)     | High                     | Low               | Low                       | Low                    |
| Brandler et al. (2015)     | High                     | Low               | Low                       | Low                    |
| Bray et al. (2005)         | Low                      | Low               | Low                       | Low                    |
| Bray et al. (2010)         | High                     | Low               | Low                       | Low                    |
| Chen et al. (2013)         | Low                      | Low               | Low                       | Low                    |
| Chenkin et al. (2009)      | Low                      | Low               | Low                       | Low                    |
| Fothergill et al. (2013)   | High                     | Low               | Low                       | Low                    |
| Frendl et al. (2009)       | High                     | Low               | Low                       | Low                    |
| Huwez Caswell (2013)       | High                     | Unclear           | Unclear                   | Unclear                |
| Kidwell et al. (2000)      | Low                      | Low               | Low                       | Low                    |
| Kothari et al. (1999)      | High                     | Low               | Low                       | Low                    |
| McMullen et al. (2017)     | High                     | Low               | Unclear                   | Unclear                |
| Mingfeng et al. (2014)     | Low                      | Low               | Low                       | Low                    |
| Mosley et al. (2007)       | Low                      | Not applicable    | Not applicable            | Not applicable         |
| Oostema et al. (2015)      | Low                      | Low               | Low                       | Low                    |
| Ramanujam (2008)           | High                     | Low               | Low                       | Low                    |
| Sheppard et al. (2013)     | High                     | Low               | Low                       | Low                    |
| Smith et al. 2009          | High                     | Not applicable    | Not applicable            | Not applicable         |
| Studnek et al. 2013        | High                     | Low               | Low                       | Low                    |
